# Supplementary material
Source: Royal Society of Chemistry journal article supplement (doi:10.1039/d6fo00014b)
Supplement: d6fo00014b2.pdf [file d6fo00014b2.pdf]

**Table Supplementary 1. Primer sequences used for qRT-PCR**

| <b>Gene</b>                                                | <b>Forward</b>              | <b>Reverse</b>             |
|------------------------------------------------------------|-----------------------------|----------------------------|
| <b><i>β-actin</i></b><br><b>(Mouse)</b>                    | AGAAGATCTGGCACCAC<br>ACC    | TACGACCAGAGGCATAC<br>AGG   |
| <b><i>IL1β</i></b><br><b>(Mouse)</b>                       | GTGTCTTTCCCGTGGACC<br>TT    | AATGGGAACGTCACACA<br>CCA   |
| <b><i>TNFα</i></b><br><b>(Mouse)</b>                       | AGCCGATGGGTTGTACC<br>TTG    | ATAGCAAATCGGCTGAC<br>GGT   |
| <b><i>IL6</i></b><br><b>(Mouse)</b>                        | CTTCTTGGGACTGATGCT<br>GGT   | CTCTGTGAAGTCTCCTCT<br>CCG  |
| <b><i>IL10</i></b><br><b>(Mouse)</b>                       | TCACTCTTCACCTGCTCC<br>AC    | CTATGCTGCCTGCTCTTA<br>CTC  |
| <b><i>PPARGC</i></b><br><b><i>1A</i></b><br><b>(Mouse)</b> | GACAGCTTTCTGGGTGG<br>ATT    | CGCAGGCTCATTGTTGT<br>ACT   |
| <b><i>β-actin</i></b><br><b>(Human)</b>                    | TGACGTGGACATCCGCA<br>AAG    | CTGGAAGGTGGACAGCG<br>AGG   |
| <b><i>PPARGC</i></b><br><b><i>1A</i></b><br><b>(Human)</b> | TCTGAGTCTGTATGGAG<br>TGACAT | CCAAGTCGTTACATCT<br>AGTTCA |
