# Supplementary material
Source: Royal Society of Chemistry journal article supplement (doi:10.1039/d6fo00014b)

Figure 5

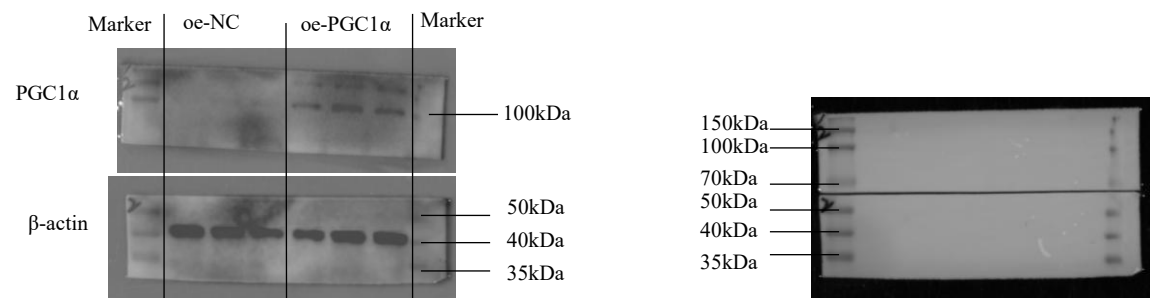

Figure 8

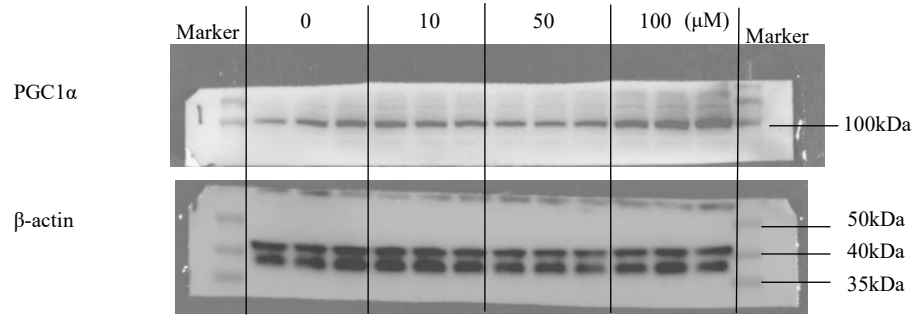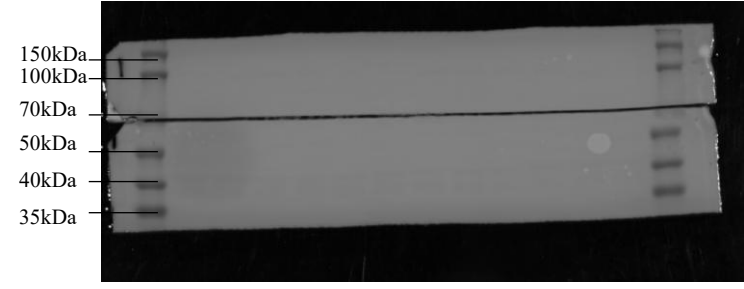

Figure 8

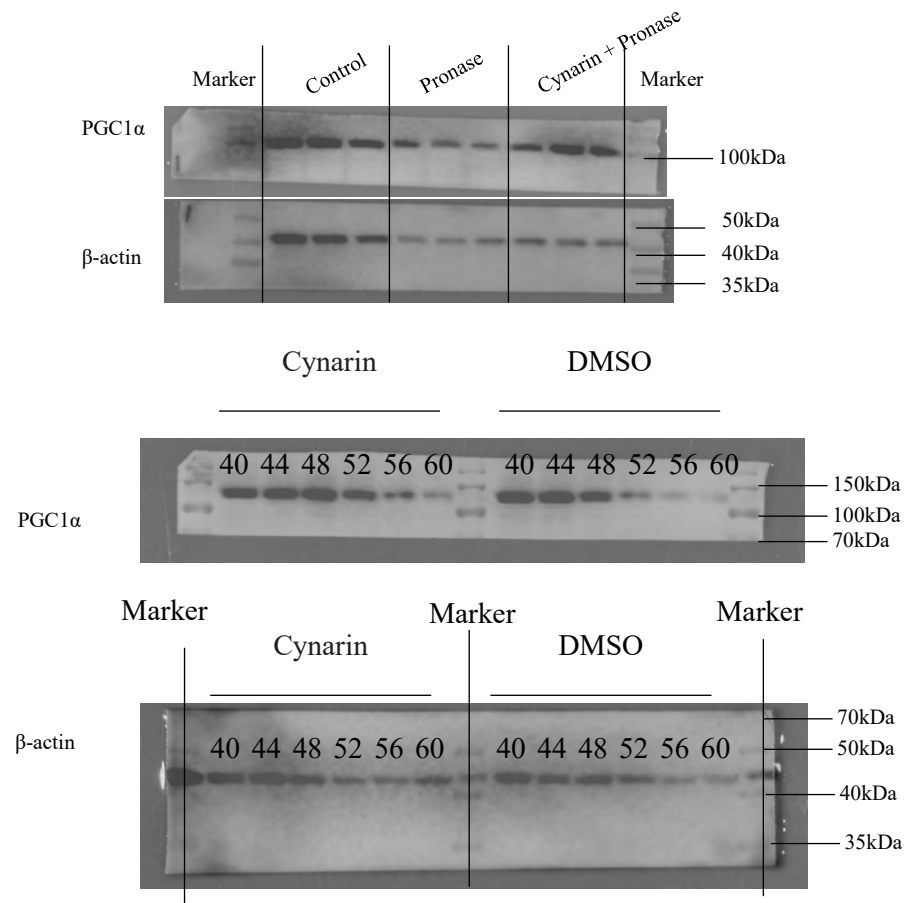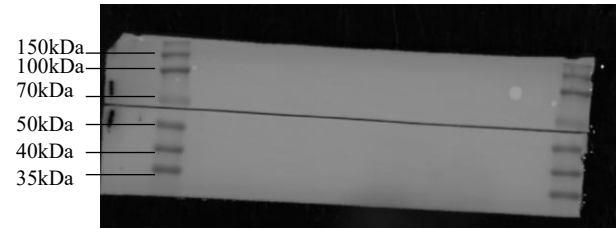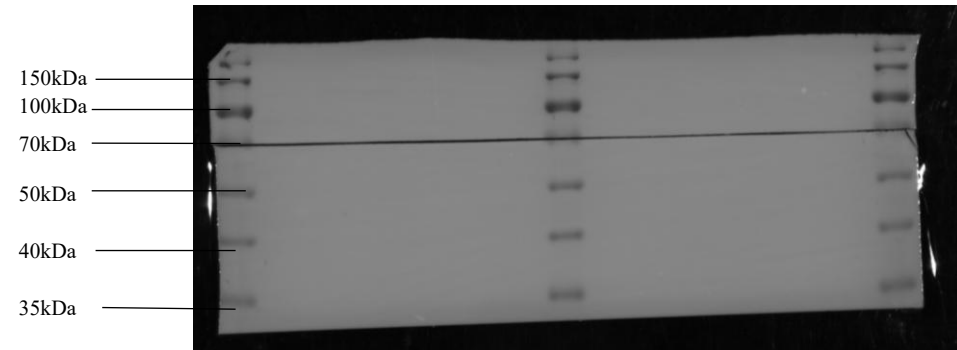

Figure 9

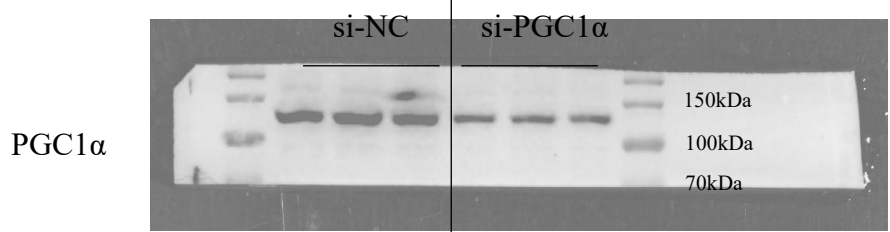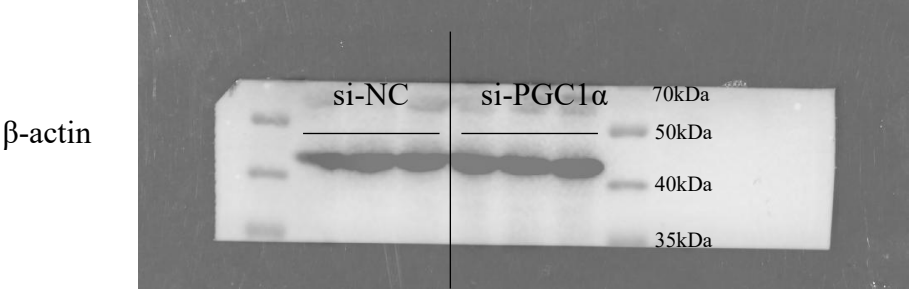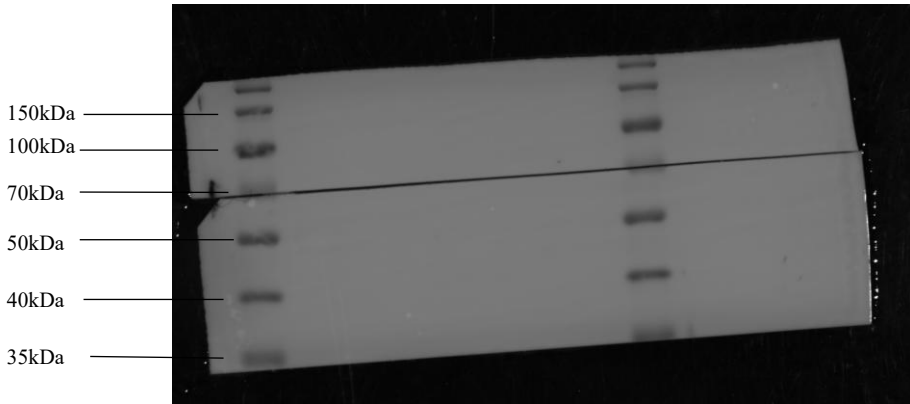

Supplement: d6fo00014b1.pdf [file d6fo00014b1.pdf]
